# Supplementary material for: FIRE Study: Real-World Effectiveness and Safety of Ibrutinib in Clinical Practice in Patients with CLL and MCL
Source: PubMed Central journal article supplement (PMC9492818; doi:10.1007/s44228-022-00015-5), 2022-09-14
Supplement: 44228_2022_15_MOESM1_ESM.pdf [file 44228_2022_15_MOESM1_ESM.pdf]

**Supplementary information for:**

FIRE Study: Real-World Effectiveness and Safety of Ibrutinib in Clinical Practice in Patients

With CLL and MCL

*Clinical Hematology International*

Caroline Dartigeas, Borhane Slama, Margaret Doyle, Christoph Tapprich, Claire Albrecht,

Sandrine Dupuis, Robert Wapenaar, Charlotte Schmidt-Hieber, Veronique Leblond

Corresponding author: Caroline Dartigeas, Service Hématologie et Thérapie Cellulaire,

Hôpital Bretonneau, Tours, France. Email: [C.DARTIGEAS@chu-tours.fr](mailto:C.DARTIGEAS@chu-tours.fr)

**Supplementary Table 1** Most common ( $\geq 2\%$  all events) severe TEAEs by system organ class and preferred term, split by relationship with ibrutinib: prospective CLL/SLL patients in safety population

| <b>System Organ Class</b>                                                                     |                  |                    |                   |
|-----------------------------------------------------------------------------------------------|------------------|--------------------|-------------------|
| <b>Preferred Term</b>                                                                         | <b>Related</b>   | <b>Not Related</b> | <b>All Events</b> |
| <b>At least one severe TEAE, <i>n</i> (%)</b>                                                 | <b>72 (35.6)</b> | <b>64 (31.7)</b>   | <b>110 (54.5)</b> |
| <b>Blood and lymphatic system disorders, <i>n</i> (%)</b>                                     | <b>42 (20.8)</b> | <b>20 (9.9)</b>    | <b>54 (26.7)</b>  |
| Lymphocytosis                                                                                 | 24 (11.9)        | 3 (1.5)            | 26 (12.9)         |
| Thrombocytopenia                                                                              | 8 (4.0)          | 6 (3.0)            | 14 (6.9)          |
| Neutropenia                                                                                   | 9 (4.5)          | 7 (3.5)            | 13 (6.4)          |
| Anemia                                                                                        | 3 (1.5)          | 6 (3.0)            | 9 (4.5)           |
| Hyperleukocytosis                                                                             | 7 (3.5)          | 1 (0.5%)           | 8 (4.0)           |
| <b>Infections and infestations, <i>n</i> (%)</b>                                              | <b>8 (4.0)</b>   | <b>13 (6.4)</b>    | <b>20 (9.9)</b>   |
| Septic shock                                                                                  | 3 (1.5)          | 3 (1.5)            | 6 (3.0)           |
| <b>Investigations, <i>n</i> (%)</b>                                                           | <b>11 (5.4)</b>  | <b>2 (1.0)</b>     | <b>13 (6.4)</b>   |
| Lymphocyte count increased                                                                    | 8 (4.0)          | 0                  | 8 (4.0)           |
| <b>Neoplasms benign, malignant and unspecified (including cysts and polyps), <i>n</i> (%)</b> | <b>2 ( 1.0)</b>  | <b>10 (5.0)</b>    | <b>12 (5.9)</b>   |
| Richter's syndrome                                                                            | 1 (0.5)          | 3 (1.5)            | 4 (2.0)           |
| <b>Respiratory, thoracic, and mediastinal disorders, <i>n</i> (%)</b>                         | <b>3 (1.5)</b>   | <b>9 (4.5)</b>     | <b>12 (5.9)</b>   |
| Lung disorder                                                                                 | 2 (1.0)          | 6 (3.0)            | 8 (4.0)           |
| <b>General disorders and administration site conditions, <i>n</i> (%)</b>                     | <b>5 (2.5)</b>   | <b>5 (2.5)</b>     | <b>10 (5.0)</b>   |
| Asthenia                                                                                      | 3 (1.5)          | 2 (1.0)            | 5 (2.5)           |
| General physical health deterioration                                                         | 1 (0.5)          | 3 (1.5)            | 4 (2.0)           |

| <b>System Organ Class</b>                                            |                |                    |                   |
|----------------------------------------------------------------------|----------------|--------------------|-------------------|
| <b>Preferred Term</b>                                                | <b>Related</b> | <b>Not Related</b> | <b>All Events</b> |
| <b>Cardiac disorders, <i>n</i> (%)</b>                               | <b>5 (2.5)</b> | <b>4 (2.0)</b>     | <b>9 (4.5)</b>    |
| Cardiac failure                                                      | 3 (1.5)        | 1 (0.5)            | 4 (2.0)           |
| <b>Nervous system disorders, <i>n</i> (%)</b>                        | <b>4 (2.0)</b> | <b>5 (2.5)</b>     | <b>9 (4.5)</b>    |
| <b>Musculoskeletal and connective tissue disorders, <i>n</i> (%)</b> | <b>2 (1.0)</b> | <b>6 (3.0)</b>     | <b>8 (4.0)</b>    |
| <b>Gastrointestinal disorders, <i>n</i> (%)</b>                      | <b>2 (1.0)</b> | <b>4 (2.0)</b>     | <b>6 (3.0)</b>    |
| <b>Injury, poisoning, and procedural complications, <i>n</i> (%)</b> | <b>1 (0.5)</b> | <b>4 (2.0)</b>     | <b>5 (2.5)</b>    |
| <b>Skin and subcutaneous tissue disorders, <i>n</i> (%)</b>          | <b>3 (1.5)</b> | <b>2 (1.0)</b>     | <b>5 (2.5)</b>    |
| <b>Metabolism and nutrition disorders, <i>n</i> (%)</b>              | <b>1 (0.5)</b> | <b>3 (1.5)</b>     | <b>4 (2.0)</b>    |
| <b>Surgical and medical procedures, <i>n</i> (%)</b>                 | <b>0</b>       | <b>4 (2.0)</b>     | <b>4 (2.0)</b>    |
| <b>Vascular disorders, <i>n</i> (%)</b>                              | <b>2 (1.0)</b> | <b>2 (1.0)</b>     | <b>4 (2.0)</b>    |

CLL, chronic lymphocytic leukemia; SLL, small lymphocytic lymphoma; TEAE, treatment-emergent adverse event.

**Supplementary Table 2** Most common ( $\geq 1\%$  all events) infections and infestation TEAEs in patients with CLL/SLL

| <b>System Organ Class</b>                        |                  |                    |                   |
|--------------------------------------------------|------------------|--------------------|-------------------|
| <b>Preferred Term</b>                            | <b>Related</b>   | <b>Not Related</b> | <b>Total</b>      |
| <b>Infections and infestations, <i>n</i> (%)</b> | <b>26 (12.9)</b> | <b>85 (42.1)</b>   | <b>108 (53.5)</b> |
| Bronchitis, <i>n</i> (%)                         | 3 (1.5)          | 23 (11.4)          | 26 (12.9)         |
| Urinary tract infection, <i>n</i> (%)            | 0                | 11 (5.4)           | 11 (5.4)          |
| Influenza, <i>n</i> (%)                          | 0                | 7 (3.5)            | 7 (3.5)           |
| Septic shock, <i>n</i> (%)                       | 3 (1.5)          | 3 (1.5)            | 6 (3.0)           |
| Sinusitis, <i>n</i> (%)                          | 1 (0.5)          | 5 (2.5)            | 6 (3.0)           |
| Erysipelas, <i>n</i> (%)                         | 2 (1.0)          | 3 (1.5)            | 5 (2.5)           |
| Fungal infection, <i>n</i> (%)                   | 1 (0.5)          | 4 (2.0)            | 5 (2.5)           |
| Rhinitis, <i>n</i> (%)                           | 2 (1.0)          | 3 (1.5)            | 5 (2.5)           |
| Ear infection, <i>n</i> (%)                      | 0                | 4 (2.0)            | 4 (2.0)           |
| Infection, <i>n</i> (%)                          | 1 (0.5)          | 3 (1.5)            | 4 (2.0)           |
| Nasopharyngitis, <i>n</i> (%)                    | 0                | 4 (2.0)            | 4 (2.0)           |
| Pharyngitis, <i>n</i> (%)                        | 0                | 4 (2.0)            | 4 (2.0)           |
| Sepsis, <i>n</i> (%)                             | 1 (0.5)          | 3 (1.5)            | 4 (2.0)           |
| Conjunctivitis, <i>n</i> (%)                     | 0                | 2 (1.0)            | 3 (1.5)           |
| Pneumonia, <i>n</i> (%)                          | 0                | 2 (1.0)            | 3 (1.5)           |
| Upper respiratory tract infection, <i>n</i> (%)  | 0                | 3 (1.5)            | 3 (1.5)           |
| Cystitis, <i>n</i> (%)                           | 0                | 2 (1.0)            | 2 (1.0)           |
| Gastroenteritis, <i>n</i> (%)                    | 0                | 2 (1.0)            | 2 (1.0)           |
| Herpes zoster, <i>n</i> (%)                      | 1 (0.5)          | 1 (0.5)            | 2 (1.0)           |

| <b>System Organ Class</b>                             |                |                    |              |
|-------------------------------------------------------|----------------|--------------------|--------------|
| <b>Preferred Term</b>                                 | <b>Related</b> | <b>Not Related</b> | <b>Total</b> |
| Lung infection, <i>n</i> (%)                          | 0              | 2 (1.0)            | 2 (1.0)      |
| Onychomycosis, <i>n</i> (%)                           | 1 (0.5)        | 1 (0.5)            | 2 (1.0)      |
| Paronychia, <i>n</i> (%)                              | 0              | 2 (1.0)            | 2 (1.0)      |
| <i>Pneumocystis jirovecii</i> pneumonia, <i>n</i> (%) | 2 (1.0)        | 0                  | 2 (1.0)      |
| Pneumonia pneumococcal, <i>n</i> (%)                  | 1 (0.5)        | 1 (0.5)            | 2 (1.0)      |
| Viral infection, <i>n</i> (%)                         | 0              | 2 (1.0)            | 2 (1.0)      |

CLL, chronic lymphocytic leukemia; SLL, small lymphocytic lymphoma; TEAE, treatment-emergent adverse event.

**Supplementary Table 3** Most common ( $\geq 2\%$  all events) severe TEAEs by system organ class and preferred term split by relationship with ibrutinib: prospective MCL patients in safety population

| <b>System Organ Class</b>                                                 |                  |                    |                   |
|---------------------------------------------------------------------------|------------------|--------------------|-------------------|
| <b>Preferred Term</b>                                                     | <b>Related</b>   | <b>Not Related</b> | <b>All Events</b> |
| <b>At least one severe TEAE, <i>n</i> (%)</b>                             | <b>12 (20.3)</b> | <b>30 (50.8)</b>   | <b>36 (61.0)</b>  |
| <b>General disorders and administration site conditions, <i>n</i> (%)</b> | <b>1 (1.7)</b>   | <b>14 (23.7)</b>   | <b>15 (25.4)</b>  |
| General physical health deterioration                                     | 0                | 13 (22.0)          | 13 (22.0)         |
| Asthenia                                                                  | 1 (1.7)          | 1 (1.7)            | 2 (3.4)           |
| <b>Blood and lymphatic system disorders, <i>n</i> (%)</b>                 | <b>4 (6.8)</b>   | <b>5 (8.5)</b>     | <b>9 (15.3)</b>   |
| Thrombocytopenia                                                          | 1 (1.7)          | 3 (5.1)            | 4 (6.8)           |
| Lymphocytosis                                                             | 2 (3.4)          | 1 (1.7)            | 3 (5.1)           |
| Neutropenia                                                               | 2 (3.4)          | 1 (1.7)            | 3 (5.1)           |
| Anemia                                                                    | 0                | 2 (3.4)            | 2 (3.4)           |
| <b>Infections and infestations, <i>n</i> (%)</b>                          | <b>2 (3.4)</b>   | <b>6 (10.2)</b>    | <b>8 (13.6)</b>   |
| <b>Respiratory, thoracic, and mediastinal disorders, <i>n</i> (%)</b>     | <b>2 (3.4)</b>   | <b>4 (6.8)</b>     | <b>6 (10.2)</b>   |
| Dyspnea                                                                   | 1 (1.7)          | 2 (3.4)            | 3 (5.1)           |
| Lung disorder                                                             | 0                | 2 (3.4)            | 2 (3.4)           |
| <b>Cardiac disorders, <i>n</i> (%)</b>                                    | <b>3 (5.1)</b>   | <b>1 (1.7)</b>     | <b>4 (6.8)</b>    |
| Atrial fibrillation                                                       | 2 (3.4)          |                    | 2 (3.4)           |

| <b>System Organ Class</b>                                            |                |                    |                   |
|----------------------------------------------------------------------|----------------|--------------------|-------------------|
| <b>Preferred Term</b>                                                | <b>Related</b> | <b>Not Related</b> | <b>All Events</b> |
| <b>Injury, poisoning, and procedural complications, <i>n</i> (%)</b> | <b>1 (1.7)</b> | <b>2 (3.4)</b>     | <b>3 (5.1)</b>    |
| <b>Metabolism and nutrition disorders, <i>n</i> (%)</b>              | <b>0</b>       | <b>2 (3.4)</b>     | <b>2 (3.4)</b>    |
| Tumor lysis syndrome                                                 | 0              | 2 (3.4)            | 2 (3.4)           |
| <b>Nervous system disorders, <i>n</i> (%)</b>                        | <b>0</b>       | <b>2 (3.4)</b>     | <b>2 (3.4)</b>    |

MCL, mantle cell lymphoma; TEAE, treatment-emergent adverse event.

**Supplementary Table 4** Infections and infestation TEAEs in patients with MCL

| <b>All Events</b>                                     |                |                    |                  |
|-------------------------------------------------------|----------------|--------------------|------------------|
| <b>System Organ Class</b>                             |                |                    |                  |
| <b>Preferred Term</b>                                 | <b>Related</b> | <b>Not Related</b> | <b>Total</b>     |
| <b>Infections and infestations, <i>n</i> (%)</b>      | <b>5 (8.5)</b> | <b>17 (28.8)</b>   | <b>19 (32.2)</b> |
| Bronchitis, <i>n</i> (%)                              | 0              | 3 (5.1)            | 3 (5.1)          |
| Urinary tract infection                               | 1 (1.7)        | 3 (5.1)            | 3 (5.1)          |
| Lung infection, <i>n</i> (%)                          | 0              | 2 (3.4)            | 2 (3.4)          |
| Pneumonia, <i>n</i> (%)                               | 0              | 2 (3.4)            | 2 (3.4)          |
| Bacterial sepsis, <i>n</i> (%)                        | 0              | 1 (1.7)            | 1 (1.7)          |
| Campylobacter gastroenteritis, <i>n</i> (%)           | 0              | 1 (1.7)            | 1 (1.7)          |
| Conjunctivitis bacterial, <i>n</i> (%)                | 1 (1.7)        | 0                  | 1 (1.7)          |
| Enterobacter infection, <i>n</i> (%)                  | 0              | 1 (1.7)            | 1 (1.7)          |
| Escherichia sepsis, <i>n</i> (%)                      | 0              | 1 (1.7)            | 1 (1.7)          |
| Folliculitis, <i>n</i> (%)                            | 0              | 1 (1.7)            | 1 (1.7)          |
| Gastroenteritis, <i>n</i> (%)                         | 0              | 1 (1.7)            | 1 (1.7)          |
| Herpes zoster, <i>n</i> (%)                           | 0              | 1 (1.7)            | 1 (1.7)          |
| Hordeolum, <i>n</i> (%)                               | 0              | 1 (1.7)            | 1 (1.7)          |
| Infection, <i>n</i> (%)                               | 0              | 1 (1.7)            | 1 (1.7)          |
| Influenza, <i>n</i> (%)                               | 0              | 1 (1.7)            | 1 (1.7)          |
| Nocardiosis, <i>n</i> (%)                             | 1 (1.7)        | 0                  | 1 (1.7)          |
| Paronychia, <i>n</i> (%)                              | 1 (1.7)        | 1 (1.7)            | 1 (1.7)          |
| Peritonitis, <i>n</i> (%)                             | 0              | 1 (1.7)            | 1 (1.7)          |
| <i>Pneumocystis jirovecii</i> pneumonia, <i>n</i> (%) | 1 (1.7)        | 0                  | 1 (1.7)          |



| <b>All Events</b>                               |                |                    |              |
|-------------------------------------------------|----------------|--------------------|--------------|
| <b>System Organ Class</b>                       |                |                    |              |
| <b>Preferred Term</b>                           | <b>Related</b> | <b>Not Related</b> | <b>Total</b> |
| Sepsis, <i>n</i> (%)                            | 0              | 1 (1.7)            | 1 (1.7)      |
| Systemic candida, <i>n</i> (%)                  | 0              | 1 (1.7)            | 1 (1.7)      |
| Upper respiratory tract infection, <i>n</i> (%) | 0              | 1 (1.7)            | 1 (1.7)      |

MCL, mantle cell lymphoma; TEAE, treatment-emergent adverse event.
